# Supplementary material
Source: MDPI journal article supplement (https://www.mdpi.com/2071-1050/13/24/13636)
Supplement: s1 [file s1]

| Supplementary Table S1: Preventive and protective measures against COVID-19 from international agencies |                                                                                                                                                                                                       |                                                                                                                                                                                       |                                                                                                                 |                                                                                                                                                                        |                                                                                                                                                                   |                                                                                                                                                                     |
|---------------------------------------------------------------------------------------------------------|-------------------------------------------------------------------------------------------------------------------------------------------------------------------------------------------------------|---------------------------------------------------------------------------------------------------------------------------------------------------------------------------------------|-----------------------------------------------------------------------------------------------------------------|------------------------------------------------------------------------------------------------------------------------------------------------------------------------|-------------------------------------------------------------------------------------------------------------------------------------------------------------------|---------------------------------------------------------------------------------------------------------------------------------------------------------------------|
|                                                                                                         | WHO<br>[25,34-38]                                                                                                                                                                                     | CDC<br>[44-47]                                                                                                                                                                        | OSHA<br>[42,43]                                                                                                 | ECDC<br>[48-51]                                                                                                                                                        | ILO<br>[39-41]                                                                                                                                                    | ASHRAE<br>[53-58]                                                                                                                                                   |
| <b>1. Engineering Control</b>                                                                           |                                                                                                                                                                                                       |                                                                                                                                                                                       |                                                                                                                 |                                                                                                                                                                        |                                                                                                                                                                   |                                                                                                                                                                     |
| <b>1.1 Ventilation</b>                                                                                  |                                                                                                                                                                                                       |                                                                                                                                                                                       |                                                                                                                 |                                                                                                                                                                        |                                                                                                                                                                   |                                                                                                                                                                     |
| Increase ventilation rate / outdoor air ventilation                                                     | <ul style="list-style-type: none"> <li>Add or modify windows and doors to enable cross ventilation</li> <li>Open HVAC systems with maximum outside airflow before and after occupied times</li> </ul> | <ul style="list-style-type: none"> <li>Open windows and doors</li> <li>Eliminate recirculation</li> <li>Run HVAC system with maximum outside airflow before occupied times</li> </ul> | <ul style="list-style-type: none"> <li>Increase ventilation rate</li> <li>Avoid air-recirculation</li> </ul>    | <ul style="list-style-type: none"> <li>Open windows and doors</li> <li>Avoid air-recirculation</li> <li>Keep heating, cooling, and humidification setpoints</li> </ul> | <ul style="list-style-type: none"> <li>Open windows and doors</li> <li>Maintain recirculation with outdoor air</li> <li>Properly maintain HVAC systems</li> </ul> | <ul style="list-style-type: none"> <li>Requirements for outdoor air ventilation</li> <li>Eliminate recirculation</li> <li>Properly maintain HVAC systems</li> </ul> |
| Using stand-alone air cleaner                                                                           | <ul style="list-style-type: none"> <li>MERV 14 / ISO ePM1 70-80% filter</li> <li>Consider portable HEPA/ Ultraviolet Germicidal Irradiation (UVGI)</li> </ul>                                         | MERV 13 or higher                                                                                                                                                                     | <ul style="list-style-type: none"> <li>Install high-efficiency air filters</li> </ul>                           | <ul style="list-style-type: none"> <li>Use stand-alone air-cleaning devices equipped with a HEPA or comparable filter</li> </ul>                                       | <ul style="list-style-type: none"> <li>Install a high-efficiency air filter</li> </ul>                                                                            | <ul style="list-style-type: none"> <li>Improve central air and other HVAC filtration to MERV-13 or highest level achievable</li> </ul>                              |
| Negative pressure ventilation                                                                           | -                                                                                                                                                                                                     | -                                                                                                                                                                                     | <ul style="list-style-type: none"> <li>Apply negative pressure ventilation</li> </ul>                           | <ul style="list-style-type: none"> <li>Apply negative pressure in specialized rooms</li> </ul>                                                                         | <ul style="list-style-type: none"> <li>Apply specialized negative pressure ventilation in specific areas</li> </ul>                                               | <ul style="list-style-type: none"> <li>Apply negative pressure in specific areas</li> </ul>                                                                         |
| <b>1.2 Distancing &amp; Building Layout</b>                                                             |                                                                                                                                                                                                       |                                                                                                                                                                                       |                                                                                                                 |                                                                                                                                                                        |                                                                                                                                                                   |                                                                                                                                                                     |
| Maintain distancing                                                                                     | <ul style="list-style-type: none"> <li>At least 1 meter</li> <li>Queue management</li> <li>Install and frequently clean plexiglass barriers</li> </ul>                                                | <ul style="list-style-type: none"> <li>at least 6 feet by partitional control using face covering</li> <li>Close / limit the use of shared spaces</li> </ul>                          | <ul style="list-style-type: none"> <li>Install physical barriers such as clear plastic sneeze guards</li> </ul> | <ul style="list-style-type: none"> <li>Physical distancing 1-2 meters and barrier installation</li> </ul>                                                              | <ul style="list-style-type: none"> <li>2 meters</li> <li>Install physical barriers</li> <li>Limit the capacity of workplaces / common areas</li> </ul>            | <ul style="list-style-type: none"> <li>Keep social distancing</li> </ul>                                                                                            |
| Strict control over external accesses                                                                   | -                                                                                                                                                                                                     | -                                                                                                                                                                                     | <ul style="list-style-type: none"> <li>Install drive-through windows for customer service</li> </ul>            | -                                                                                                                                                                      | <ul style="list-style-type: none"> <li>Install drive-through windows for customer service</li> <li>Organize a one-way system</li> </ul>                           | -                                                                                                                                                                   |

| Supplementary Table S1: Preventive and protective measures against COVID-19 from international agencies (Cont) |                                                                                          |                                                                                                                                         |                                                                                                           |                                                                                                                            |                                                                                                                                                            |                                                                                       |
|----------------------------------------------------------------------------------------------------------------|------------------------------------------------------------------------------------------|-----------------------------------------------------------------------------------------------------------------------------------------|-----------------------------------------------------------------------------------------------------------|----------------------------------------------------------------------------------------------------------------------------|------------------------------------------------------------------------------------------------------------------------------------------------------------|---------------------------------------------------------------------------------------|
|                                                                                                                | WHO<br>[25,34-38]                                                                        | CDC<br>[44-47]                                                                                                                          | OSHA<br>[42,43]                                                                                           | ECDC<br>[48-51]                                                                                                            | ILO<br>[39-41]                                                                                                                                             | ASHRAE<br>[53-58]                                                                     |
| <b>1.3 Facilities and equipment</b>                                                                            |                                                                                          |                                                                                                                                         |                                                                                                           |                                                                                                                            |                                                                                                                                                            |                                                                                       |
| Employ touchless technology and proper surface materials                                                       | - Use sensors, foot pumps, and large handles that are controlled with the lower arm      | - Use touchless hand sanitizer dispensers                                                                                               | - Use touchless hand sanitizer dispensers                                                                 | - Use appropriate devices such as no-touch waste bins                                                                      | -                                                                                                                                                          | -                                                                                     |
| <b>1.4 Water and sanitary system safety</b>                                                                    |                                                                                          |                                                                                                                                         |                                                                                                           |                                                                                                                            |                                                                                                                                                            |                                                                                       |
| Water quality in sanitation and plumbing systems                                                               | - Safety drinking water, faeces, and sewage                                              | - Eliminate stagnant or standing waters<br>- Control indoor humidity to not exceed 50%<br>- Prevent mold by control indoor temperature  | -                                                                                                         | -                                                                                                                          | -                                                                                                                                                          | - Building water systems should be flushed before reopening; Refer to ASHRAE 188-2018 |
| <b>2. Administrative and Organizational Controls</b>                                                           |                                                                                          |                                                                                                                                         |                                                                                                           |                                                                                                                            |                                                                                                                                                            |                                                                                       |
| <b>2.1 Workplace Safety Measures</b>                                                                           |                                                                                          |                                                                                                                                         |                                                                                                           |                                                                                                                            |                                                                                                                                                            |                                                                                       |
| Enhance hand hygiene / self-hygiene measures                                                                   | - Promote hand washing by soap and water or alcohol-based hand sanitizing rub dispensers | - Maintain proper hygiene by hand washing<br>- Encourage employees to bring drinking water from home<br>- Monitor employee health daily | - Promote hand washing resources<br>- Encourage employees to not use other's accessories                  | - Promote hand hygiene by washing hands with soap and water for 20-40 seconds or with 60-85% alcohol-based hand sanitizers | - Promote frequent hand washing with soap and water or alcohol<br>- Promote use of paper towels<br>- Avoid sharing items in office<br>- Reduce use of cash | - Promote hygiene and sanitation                                                      |
| Promote respiratory etiquette                                                                                  | - Develop face-covering policy                                                           | - Cover coughs and Sneezes<br>- Recommend at least two layers of face masks without exhalation valves or vents                          | - Encourage respiratory etiquette<br>- Provide customers and the public with tissue and trash receptacles | - Cover mouth and nose when coughing and sneezing<br>- Wear face masks in indoors and crowded outdoor settings             | - Instruct workers to avoid contact when greeting and encourage respiratory etiquette                                                                      | - Encourage mask-wearing                                                              |

| Supplementary Table S1: Preventive and protective measures against COVID-19 from international agencies (Cont)                                               |                                                                                                                                                                                      |                                                                                                                                      |                                                                                                               |                                                                                                       |                                                                                                       |                   |
|--------------------------------------------------------------------------------------------------------------------------------------------------------------|--------------------------------------------------------------------------------------------------------------------------------------------------------------------------------------|--------------------------------------------------------------------------------------------------------------------------------------|---------------------------------------------------------------------------------------------------------------|-------------------------------------------------------------------------------------------------------|-------------------------------------------------------------------------------------------------------|-------------------|
|                                                                                                                                                              | WHO<br>[25,34-38]                                                                                                                                                                    | CDC<br>[44-47]                                                                                                                       | OSHA<br>[42,43]                                                                                               | ECDC<br>[48-51]                                                                                       | ILO<br>[39-41]                                                                                        | ASHRAE<br>[53-58] |
| Routine screening                                                                                                                                            | - Thermal screening at workplace                                                                                                                                                     | - Conduct daily in-person screening (Temperature and symptoms)<br>- Consider testing for SAR-CoV-2                                   | - Follow state or local guidelines for screening                                                              | - Implement screening at points of entry                                                              | -                                                                                                     | -                 |
| Proper waste management                                                                                                                                      | - Clean bins and waste should be placed in strong bags that are completely closed                                                                                                    | - Provide no-touch trash cans                                                                                                        | - Provide no-touch trash cans                                                                                 | - Provide no-touch trash bins                                                                         | -                                                                                                     | -                 |
| <b>2.2 Cleaning and Disinfection</b>                                                                                                                         |                                                                                                                                                                                      |                                                                                                                                      |                                                                                                               |                                                                                                       |                                                                                                       |                   |
| - Regular cleanings with disinfectants (0.1% / 1000 ppm sodium hypochlorite, or 5% sodium hypochlorite to 50 parts water), especially of high touch surfaces | - Routine cleaning and disinfection with EPA-approved products (List N: Disinfectants) or bleach solution, ultrasonic waves, high intensity ultraviolet radiation, or LED blue light | - Maintain regular housekeeping practices by EPA-approved methods and follow existing OSHA standards<br>- Follow CDC guideline       | - Regular cleaning and disinfection with biocidal products regulated by the Biocidal Product Regulation (BPR) | - Increase cleaning of frequently touched surfaces                                                    | -                                                                                                     |                   |
| <b>2.3 Emergency Plan Development</b>                                                                                                                        |                                                                                                                                                                                      |                                                                                                                                      |                                                                                                               |                                                                                                       |                                                                                                       |                   |
| Emergency plan preparedness                                                                                                                                  | - Prepare standard operating procedures and plans for isolating someone who falls ill without stigmatization or discrimination                                                       | - Identify workplace coordinator                                                                                                     | - Develop policies and procedures to identify, isolate and report employee sicknesses                         | - Develop emergency risk communication                                                                | - Establish health monitoring policies and response measures for sick or potentially infected workers | -                 |
| Suspected or confirmed case measures                                                                                                                         | - Limit the number of people who come in contact with sick person<br>- Contact local health authorities                                                                              | - Separate sick employees<br>- Clean facility after suspected or confirmed COVID-19 case<br>- Report number of infections and deaths | -                                                                                                             | - Separate sick employees<br>- Ventilate buildings with fresh air for 1 hour and clean with detergent | -                                                                                                     | -                 |

| Supplementary Table S1: Preventive and protective measures against COVID-19 from international agencies (Cont) |                                                                                                                                                                                                           |                                                                                                                                                                            |                                                                                                                                                     |                                                                                                                                                          |                                                                                                                                                              |                                                                                                            |
|----------------------------------------------------------------------------------------------------------------|-----------------------------------------------------------------------------------------------------------------------------------------------------------------------------------------------------------|----------------------------------------------------------------------------------------------------------------------------------------------------------------------------|-----------------------------------------------------------------------------------------------------------------------------------------------------|----------------------------------------------------------------------------------------------------------------------------------------------------------|--------------------------------------------------------------------------------------------------------------------------------------------------------------|------------------------------------------------------------------------------------------------------------|
|                                                                                                                | WHO<br>[25,34-38]                                                                                                                                                                                         | CDC<br>[44-47]                                                                                                                                                             | OSHA<br>[42,43]                                                                                                                                     | ECDC<br>[48-51]                                                                                                                                          | ILO<br>[39-41]                                                                                                                                               | ASHRAE<br>[53-58]                                                                                          |
| <b>2.4 Business Continuity Guideline</b>                                                                       |                                                                                                                                                                                                           |                                                                                                                                                                            |                                                                                                                                                     |                                                                                                                                                          |                                                                                                                                                              |                                                                                                            |
| Transition to remote work                                                                                      | <ul style="list-style-type: none"> <li>- Implement work from home strategy</li> <li>- Implement travel policy</li> </ul>                                                                                  | <ul style="list-style-type: none"> <li>- Evaluate feasibility of accomplishing work by telework</li> </ul>                                                                 | <ul style="list-style-type: none"> <li>- Minimize contact among workers and clients</li> </ul>                                                      | <ul style="list-style-type: none"> <li>- Implement teleworking and flexible working arrangements</li> <li>- Implement travel-related measures</li> </ul> | -                                                                                                                                                            | -                                                                                                          |
| Shift working                                                                                                  | <ul style="list-style-type: none"> <li>- Stagger working hours</li> <li>- Implement shifts or split-team arrangements</li> </ul>                                                                          | <ul style="list-style-type: none"> <li>- Stagger employee shifts</li> </ul>                                                                                                | <ul style="list-style-type: none"> <li>- Reduce number of employees at a given time by establishing alternating days or extra shifts</li> </ul>     | <ul style="list-style-type: none"> <li>- Implement flexible working schedules or shifts for employees</li> </ul>                                         | <ul style="list-style-type: none"> <li>- Implement staggered and extra shifts or have workers present on alternate days</li> </ul>                           | -                                                                                                          |
| Encourage employees of self-monitoring                                                                         | <ul style="list-style-type: none"> <li>- Observe and monitor employees' health</li> </ul>                                                                                                                 | <ul style="list-style-type: none"> <li>- Encourage sick employees to stay home</li> </ul>                                                                                  | <ul style="list-style-type: none"> <li>- Encourage self-monitoring and staying at home when sick</li> </ul>                                         | <ul style="list-style-type: none"> <li>- Encourage self-monitoring of symptoms</li> </ul>                                                                | -                                                                                                                                                            | -                                                                                                          |
| Implementing support policy / Concern for vulnerable employees                                                 | <ul style="list-style-type: none"> <li>- Perform work risk assessment</li> <li>- Be cognizant of employees' mental health, focusing particular attention on vulnerable and marginalized groups</li> </ul> | <ul style="list-style-type: none"> <li>- Implement flexible sick leave policies and practices</li> <li>- Protect workers with higher risk (elderly or disabled)</li> </ul> | <ul style="list-style-type: none"> <li>- Establish flexible worksite policies</li> <li>- Develop COVID-19 preparedness and response plan</li> </ul> | <ul style="list-style-type: none"> <li>- Risk assessment for various protective method</li> <li>- Assure protection of vulnerable groups</li> </ul>      | <ul style="list-style-type: none"> <li>- Risk assessment to determine preventive and control measures</li> <li>- Plan and organize return to work</li> </ul> | <ul style="list-style-type: none"> <li>- Implement strategies to reduce the number of occupants</li> </ul> |

| Supplementary Table S1: Preventive and protective measures against COVID-19 from international agencies (Cont) |                                                                                     |                                                                                                |                                                         |                                                  |                                                                                         |                                |
|----------------------------------------------------------------------------------------------------------------|-------------------------------------------------------------------------------------|------------------------------------------------------------------------------------------------|---------------------------------------------------------|--------------------------------------------------|-----------------------------------------------------------------------------------------|--------------------------------|
|                                                                                                                | WHO<br>[25,34-38]                                                                   | CDC<br>[44-47]                                                                                 | OSHA<br>[42,43]                                         | ECDC<br>[48-51]                                  | ILO<br>[39-41]                                                                          | ASHRAE<br>[53-58]              |
| <b>2.5 Education and Communication</b>                                                                         |                                                                                     |                                                                                                |                                                         |                                                  |                                                                                         |                                |
| Establish communication policy                                                                                 | -                                                                                   | -                                                                                              | - Implement emergency communication plan                | - Communicate risk of COVID-19                   | -                                                                                       | -                              |
| Hygienic measures communication                                                                                | - Promote handwashing with effective media                                          | - Educate employees to self-protect                                                            | - Encourage hand washing by posting signs in restrooms  | -                                                | - Provide information about ergonomic risks during remote work                          | -                              |
| COVID-19 information communication                                                                             | - Provide regular information about the risks of COVID-19 by using official sources | - Consider the level of COVID-19 risk and monitor state and local public health communications | - Provide up to date education and training on COVID-19 | -                                                | - Arrange signage with preventive measures<br>- Communicate confirmed cases of COVID-19 | -                              |
| Employee training/<br>Feedback response                                                                        | - Engage workers in providing feedback                                              | - Provide training to employees<br>- Implement safe methods for workers to voice concerns      | - Provide training in protective clothing and equipment | -                                                | -                                                                                       | -                              |
| <b>3. Personal Protective Equipment (PPE)</b>                                                                  |                                                                                     |                                                                                                |                                                         |                                                  |                                                                                         |                                |
| PPE                                                                                                            | - Use face masks                                                                    | - Identify necessary PPE<br>- Provide appropriate PPE to workers                               | - Provide select PPE to workers exposed to hazards      | - Recommend the wearing of face masks and gloves | - Select PPE based on employees' risk of infection while working                        | - Implement the wearing of PPE |
